# Supplementary material for: Understanding the uptake of diagnostics for sustainable gastrointestinal nematode control by European dairy cattle farmers: a multi-country cross-sectional study
Source: PubMed Central journal article supplement (PMC9912928; doi:10.1051/parasite/2023002), 2023-02-10
Supplement: parasite-30-4-s1.pdf [file parasite-30-4-s1.pdf]

**Supplementary file 1**

The factors included in the measurement model, corresponding items, labels and measurement scales.

| Factor label           | Item label | Item statement                                                                                | Item measurement                   |
|------------------------|------------|-----------------------------------------------------------------------------------------------|------------------------------------|
| Routine                | Q8_1       | I always apply the same treatment                                                             | 7-point Likert scale <sup>a</sup>  |
|                        | Q8_2       | I do not feel the need to change my current treatment                                         | 7-point Likert scale <sup>a</sup>  |
|                        | Q8_3       | The treatment I currently apply, is the default treatment I always apply                      | 7-point Likert scale <sup>a</sup>  |
| Attitude anthelmintics | Q10_1      | In my opinion, the application of dewormers to prevent worm infections on my farm is...       | 7-point bipolar scale <sup>b</sup> |
|                        | Q10_2      | In my opinion, the application of dewormers to prevent worm infections on my farm is...       | 7-point bipolar scale <sup>c</sup> |
|                        | Q10_3      | In my opinion, the application of dewormers to prevent worm infections on my farm is...       | 7-point bipolar scale <sup>d</sup> |
| Behaviour              | Q11_1      | Do you use some form of diagnosis to detect worm infections on your farm? – Faecal test       | 5-point Likert scale <sup>e</sup>  |
|                        | Q11_2      | Do you use some form of diagnosis to detect worm infections on your farm? – Bulk-milk test    | 5-point Likert scale <sup>e</sup>  |
|                        | Q11_3      | Do you use some form of diagnosis to detect worm infections on your farm? – Blood test        | 5-point Likert scale <sup>e</sup>  |
| Perceived control      | Q13_1      | The decision to use worm diagnosis on my farm is under my control                             | 7-point Likert scale <sup>a</sup>  |
|                        | Q13_2      | I can easily command for a diagnosis on my farm                                               | 7-point Likert scale <sup>a</sup>  |
|                        | Q13_3      | I can have a diagnosis whenever I want                                                        | 7-point Likert scale <sup>a</sup>  |
| Attitude diagnostics   | Q14_1      | In my opinion, to diagnose before treating my animals with dewormers is...                    | 7-point bipolar scale <sup>b</sup> |
|                        | Q14_2      | In my opinion, to diagnose before treating my animals with dewormers is...                    | 7-point bipolar scale <sup>c</sup> |
|                        | Q14_3      | In my opinion, to diagnose before treating my animals with dewormers is...                    | 7-point bipolar scale <sup>d</sup> |
| Behavioural intention  | Q15_1      | I expect to diagnose before using dewormers in the future                                     | 7-point Likert scale <sup>a</sup>  |
|                        | Q15_2      | I want to diagnose before using dewormers preventively on my farm                             | 7-point Likert scale <sup>a</sup>  |
|                        | Q15_3      | I intent to diagnose before treating my animals with dewormers                                | 7-point Likert scale <sup>a</sup>  |
| Descriptive norms      | Q16_1      | Most farmers use a diagnosis before deworming on their farms                                  | 7-point Likert scale <sup>a</sup>  |
|                        | Q16_3      | Most of my colleagues diagnose before they preventively apply dewormers                       | 7-point Likert scale <sup>a</sup>  |
| Subjective norms       | Q16_2      | People who are important to me think that I should diagnose before using dewormers on my farm | 7-point Likert scale <sup>a</sup>  |
|                        | Q16_4      | It is expected of me that I diagnose before treatment                                         | 7-point Likert scale <sup>a</sup>  |
|                        | Q16_5      | I feel social pressure to diagnose before using dewormers on my farm                          | 7-point Likert scale <sup>a</sup>  |

|                     |        |                                                                                                                        |                                   |
|---------------------|--------|------------------------------------------------------------------------------------------------------------------------|-----------------------------------|
| Perceived knowledge | Q17_1  | I currently know enough about worms and worming to decide on an appropriate worm control programme on my farm          | 7-point Likert scale <sup>a</sup> |
|                     | Q17_2  | I have enough information available to me that I can use to decide on an appropriate worm control programme on my farm | 7-point Likert scale <sup>a</sup> |
|                     | Q17_3  | I know what worm diagnostics are for                                                                                   | 7-point Likert scale <sup>a</sup> |
|                     | Q17_4  | I know the limitations of worm diagnostics (i.e. what they can't tell you)                                             | 7-point Likert scale <sup>a</sup> |
|                     | Q17_5  | I can interpret the results of a diagnosis and act on the information with the help of a vet/adviser                   | 7-point Likert scale <sup>a</sup> |
|                     | Q17_6  | I can interpret the results of a diagnosis and act on the information on my own                                        | 7-point Likert scale <sup>a</sup> |
| Risk severity       | Q19_1  | Anthelmintic resistance is a severe threat for animal health                                                           | 7-point Likert scale <sup>a</sup> |
|                     | Q19_3  | Anthelmintic resistance is a serious threat for animal health                                                          | 7-point Likert scale <sup>a</sup> |
|                     | Q19_5* | Anthelmintic resistance is a significant threat for animal health                                                      | 7-point Likert scale <sup>a</sup> |
| Risk susceptibility | Q19_2  | It is likely that worms on my farm will develop anthelmintic resistance                                                | 7-point Likert scale <sup>a</sup> |
|                     | Q19_4  | The worms on my farm are at risk to develop anthelmintic resistance                                                    | 7-point Likert scale <sup>a</sup> |
|                     | Q19_6* | It is probable that the worms on my farm will develop anthelmintic resistance                                          | 7-point Likert scale <sup>a</sup> |

<sup>a</sup> 1 = Strongly disagree; 2 = Disagree; 3 = Slightly disagree; 4 = Neutral; 5 = Slightly agree; 6 = Agree; 7 = Strongly agree

<sup>b</sup> 1 = Bad – 7 = Good

<sup>c</sup> 1 = Useless – 7 = Useful

<sup>d</sup> 1 = Harmful – 7 = Beneficial

<sup>e</sup> 1 = Never; 2 = I've tried it once; 3 = I've tried it more than once; 4 = When I sense problems; 5 = Every year

\* Not included in the Norwegian survey due to unsuitable translation
