# Supplementary material for: Understanding the uptake of diagnostics for sustainable gastrointestinal nematode control by European dairy cattle farmers: a multi-country cross-sectional study
Source: PubMed Central journal article supplement (PMC9912928; doi:10.1051/parasite/2023002), 2023-02-10
Supplement: parasite-30-4-s2.pdf [file parasite-30-4-s2.pdf]

**Supplementary file 2**

Test of homogeneity of variance through Levene's test analysis

| Factor label           | Item label | BF Statistic<br><i>F</i> | df1 | df2 | Sig.<br><i>p</i> |
|------------------------|------------|--------------------------|-----|-----|------------------|
| Routine                | Q8_1       | .801                     | 1   | 259 | .372             |
|                        | Q8_2       | .003                     | 1   | 258 | .957             |
|                        | Q8_3       | 1.962                    | 1   | 257 | .162             |
| Attitude anthelmintics | Q10_1      | 8.355                    | 1   | 248 | .004*            |
|                        | Q10_2      | 3.647                    | 1   | 248 | .057             |
|                        | Q10_3      | .041                     | 1   | 244 | .840             |
| Behaviour              | Q11_1      | 21.915                   | 1   | 262 | .000*            |
|                        | Q11_2      | 7.847                    | 1   | 260 | .005*            |
|                        | Q11_3      | 26.420                   | 1   | 258 | .000*            |
| Perceived control      | Q13_1      | 2.782                    | 1   | 263 | .097             |
|                        | Q13_2      | 11.950                   | 1   | 260 | .001*            |
|                        | Q13_3      | .083                     | 1   | 261 | .773             |
| Attitude diagnostics   | Q14_1      | .333                     | 1   | 255 | .564             |
|                        | Q14_2      | .3640                    | 1   | 257 | .058             |
|                        | Q14_3      | 1.006                    | 1   | 251 | .317             |
| Behavioural intention  | Q15_1      | 3.266                    | 1   | 262 | .072             |
|                        | Q15_2      | 4.427                    | 1   | 260 | .036*            |
|                        | Q15_3      | 4.350                    | 1   | 261 | .038*            |
| Descriptive norms      | Q16_1      | 2.195                    | 1   | 259 | .140             |
|                        | Q16_3      | 4.674                    | 1   | 261 | .032*            |
| Subjective norms       | Q16_2      | .894                     | 1   | 259 | .345             |
|                        | Q16_4      | .996                     | 1   | 260 | .319             |
|                        | Q16_5      | 1.952                    | 1   | 261 | .164             |
| Perceived knowledge    | Q17_1      | .195                     | 1   | 256 | .659             |
|                        | Q17_2      | .025                     | 1   | 255 | .875             |
|                        | Q17_3      | 4.050                    | 1   | 254 | .045*            |
|                        | Q17_4      | .336                     | 1   | 254 | .563             |
|                        | Q17_5      | 8.542                    | 1   | 254 | .004*            |
|                        | Q17_6      | .218                     | 1   | 254 | .641             |
| Risk severity          | Q19_1      | 3.356                    | 1   | 243 | .068             |
|                        | Q19_3      | 3.641                    | 1   | 244 | .058             |
|                        | Q19_5      | 5.844                    | 1   | 239 | .016*            |
| Risk susceptibility    | Q19_2      | .180                     | 1   | 244 | .672             |
|                        | Q19_4      | .877                     | 1   | 243 | .350             |
|                        | Q19_6      | .097                     | 1   | 240 | .755             |

\* unequal variance is established ( $p < .05$ )
