# Supplementary material for: Understanding the uptake of diagnostics for sustainable gastrointestinal nematode control by European dairy cattle farmers: a multi-country cross-sectional study
Source: PubMed Central journal article supplement (PMC9912928; doi:10.1051/parasite/2023002), 2023-02-10
Supplement: parasite-30-4-s3.pdf [file parasite-30-4-s3.pdf]

### Supplementary file 3

#### Section 1

Structural equation modelling of the dataset Italy.

Factor loadings of the items included in the primary model

| Factor label           | Item label | Factor estimate | Std. error | Std. loading      |
|------------------------|------------|-----------------|------------|-------------------|
| Routine                | Q8_1       | 1.000           |            | .524 <sup>b</sup> |
|                        | Q8_2       | 1.003           | .288       | .800 <sup>b</sup> |
|                        | Q8_3       | 1.393           | .288       | .692 <sup>b</sup> |
| Attitude anthelmintics | Q10_1      | 1.000           |            | .793              |
|                        | Q10_2      | 1.019           | .179       | .586              |
|                        | Q10_3      | 1.041           | .222       | .562              |
| Perceived control      | Q13_1      | 1.000           |            | .455 <sup>a</sup> |
|                        | Q13_2      | 1.565           | .171       | .929              |
|                        | Q13_3      | 1.449           | .158       | .834              |
| Attitude diagnostics   | Q14_1      | 1.000           |            | .812              |
|                        | Q14_2      | .914            | .103       | .726              |
|                        | Q14_3      | .894            | .092       | .726              |
| Behavioural intention  | Q15_1      | 1.000           |            | .841              |
|                        | Q15_2      | .995            | .048       | .793              |
|                        | Q15_3      | .992            | .059       | .856              |
| Descriptive norms      | Q16_1      | 1.000           |            | .397 <sup>a</sup> |
|                        | Q16_3      | 1.777           | .242       | .785 <sup>a</sup> |
| Subjective norms       | Q16_2      | 1.000           |            | .585              |
|                        | Q16_4      | 1.012           | .123       | .605              |
|                        | Q16_5      | .656            | .155       | .408 <sup>a</sup> |
| Perceived knowledge    | Q17_1      | 1.000           |            | .751 <sup>b</sup> |
|                        | Q17_2      | .950            | .068       | .721 <sup>b</sup> |
|                        | Q17_3      | .470            | .120       | .350 <sup>a</sup> |
|                        | Q17_4      | .635            | .108       | .454 <sup>b</sup> |
|                        | Q17_5      | .461            | .133       | .327 <sup>a</sup> |
|                        | Q17_6      | .479            | .112       | .335 <sup>a</sup> |
| Risk severity          | Q19_1      | 1.000           |            | .840              |
|                        | Q19_3      | .996            | .057       | .870              |
|                        | Q19_5      | .942            | .069       | .834              |
| Risk susceptibility    | Q19_2      | 1.000           |            | .794              |
|                        | Q19_4      | 1.006           | .077       | .824              |
|                        | Q19_6      | 1.084           | .090       | .833              |

<sup>a</sup> items/variables excluded from further analysis due to unsuitable factor loadings (< 0.50, > 1.00) during round 1

<sup>b</sup> items/variables excluded from further analysis due to due unsuitable regressions (e.g., insignificant correlations) and unstable construct measurements (e.g., cross-factorial correlations) during round 2

## Section 2

Structural equation modelling of the dataset Norway.

Factor loadings of the items included in the primary model

| Factor label           | Item label | Factor estimate | Std. error | Std. loading      |
|------------------------|------------|-----------------|------------|-------------------|
| Routine                | Q8_1       | 1.000           |            | .838              |
|                        | Q8_2       | .671            | .064       | .617              |
|                        | Q8_3       | .932            | .039       | .925              |
| Attitude anthelmintics | Q10_1      | 1.000           |            | .751              |
|                        | Q10_2      | 1.246           | .138       | .804              |
|                        | Q10_3      | .829            | .128       | .485 <sup>a</sup> |
| Behaviour              | Q11_1      | 1.000           |            | .899              |
|                        | Q11_2      | .962            | .172       | .603              |
|                        | Q11_3      | 1.162           | .222       | .834              |
| Perceived control      | Q13_1      | 1.000           |            | .419 <sup>a</sup> |
|                        | Q13_2      | 2.663           | .350       | .938              |
|                        | Q13_3      | 2.432           | .359       | .873              |
| Attitude diagnostics   | Q14_1      | 1.000           |            | .857              |
|                        | Q14_2      | 1.123           | .056       | .932              |
|                        | Q14_3      | .833            | .065       | .696              |
| Behavioural intention  | Q15_1      | 1.000           |            | .899              |
|                        | Q15_2      | 1.051           | .040       | .931              |
|                        | Q15_3      | 1.066           | .035       | .938              |
| Descriptive norms      | Q16_1      | 1.000           |            | .859              |
|                        | Q16_3      | .891            | .058       | .865              |
| Subjective norms       | Q16_2      | 1.000           |            | .792              |
|                        | Q16_4      | 1.119           | .078       | .860              |
|                        | Q16_5      | 0.797           | .075       | .644              |
| Perceived knowledge    | Q17_1      | 1.000           |            | .883              |
|                        | Q17_2      | .958            | .026       | .922              |
|                        | Q17_3      | .497            | .092       | .463 <sup>a</sup> |
|                        | Q17_4      | .563            | .075       | .597              |
|                        | Q17_5      | .544            | .089       | .498 <sup>a</sup> |
|                        | Q17_6      | .497            | .083       | .520 <sup>b</sup> |
| Risk severity          | Q19_1      | 1.000           |            | .959              |
|                        | Q19_3      | .771            | .196       | .723              |
| Risk susceptibility    | Q19_2      | 1.000           |            | .959              |
|                        | Q19_4      | .952            | .158       | .847              |

<sup>a</sup> items excluded from further analysis due to unsuitable factor loadings (< 0.50, > 1.00) during round 1

<sup>b</sup> items excluded from further analysis due to unsuitable factor loadings (< 0.50, > 1.00) during round 2

### Section 3

Structural equation modelling of the pooled dataset Austria and Germany.

Factor loadings of the items included in the primary model

| Factor label           | Item label | Factor estimate | Std. error | Std. loading       |
|------------------------|------------|-----------------|------------|--------------------|
| Routine                | Q8_1       | 1.000           |            | .777               |
|                        | Q8_2       | .720            | .088       | .580               |
|                        | Q8_3       | 1.013           | .087       | .862               |
| Attitude anthelmintics | Q10_2      | 1.000           |            | .934               |
|                        | Q10_3      | .932            | .147       | .845               |
| Perceived control      | Q13_1      | 1.000           |            | .511               |
|                        | Q13_3      | 2.077           | 1.447      | .881               |
| Attitude diagnostics   | Q14_1      | 1.000           |            | .818               |
|                        | Q14_2      | 1.279           | .106       | .941               |
|                        | Q14_3      | .976            | .097       | .824               |
| Subjective norms       | Q16_2      | 1.000           |            | .700               |
|                        | Q16_4      | 1.282           | .204       | .830               |
|                        | Q16_5      | 0.841           | .159       | .582               |
| Perceived knowledge    | Q17_1      | 1.000           |            | .901               |
|                        | Q17_2      | .950            | .046       | .878               |
|                        | Q17_4      | .699            | .074       | .655               |
|                        | Q17_5      | .682            | .077       | .632               |
| Risk severity          | Q19_1      | 1.000           |            | .695 <sup>a</sup>  |
|                        | Q19_3      | 1.455           | .913       | 1.056 <sup>a</sup> |
| Risk susceptibility    | Q19_2      | 1.000           |            | .795               |
|                        | Q19_4      | 1.199           | .111       | .859               |
|                        | Q19_6      | 1.365           | .119       | .940               |

<sup>a</sup> items/variables excluded from further analysis due to unsuitable factor loadings (< 0.50, > 1.00).
